# Supplementary material for: The Effects of Natural and Anthropogenic Microparticles on Individual Fitness in Daphnia magna
Source: PLoS One. 2016 May 13;11(5):e0155063. doi: 10.1371/journal.pone.0155063 (PMC4866784; doi:10.1371/journal.pone.0155063)
Supplement: S3 Table — EC50 ± 95% confidence intervals for the number of produced offspring standardized by the number of individual survived days (NID) for primary and secondary MPs (PMP and SMP) and kaolin. * EC50 is significantly lower for SMP compared to kaolin. (DOCX) [file pone.0155063.s006.docx]

**Table S3. EC50 values**

| **Type** | **EC50** | **95 % CI** |
| --- | --- | --- |
| SMP* | 8.6 × 104 | 3.7 × 104 - 1.5 × 105 |
| PMP | 2.8 × 105 | 1.1 × 105 - 1.0 × 106 |
| Kaolin | 3.0 × 105 | 4.4 × 104 - 1.5 × 106 |

EC50 ± 95% confidence intervals for the number of produced offspring standardized by the number of individual survived days (NID) for primary and secondary MPs (PMP and SMP) and kaolin. * EC50 is significantly lower for SMP compared to kaolin.
